# Supplementary material for: Predicting the Potential Distribution of the Szechwan Rat Snake (Euprepiophis perlacea) and Its Response to Climate Change in the Yingjing Area of the Giant Panda National Park
Source: MDPI journal article supplement (doi:10.3390/ani13243828), 2023-12-12
Supplement: s1 [file s1]

Supporting Information for

**Predicting the potential distribution of Szechwan  
rat snake (*Euprepiophis perlacea*) and its response to  
climate change in Yingjing area of Giant Panda  
National Park**

This file includes:

Figure S1

Table S1

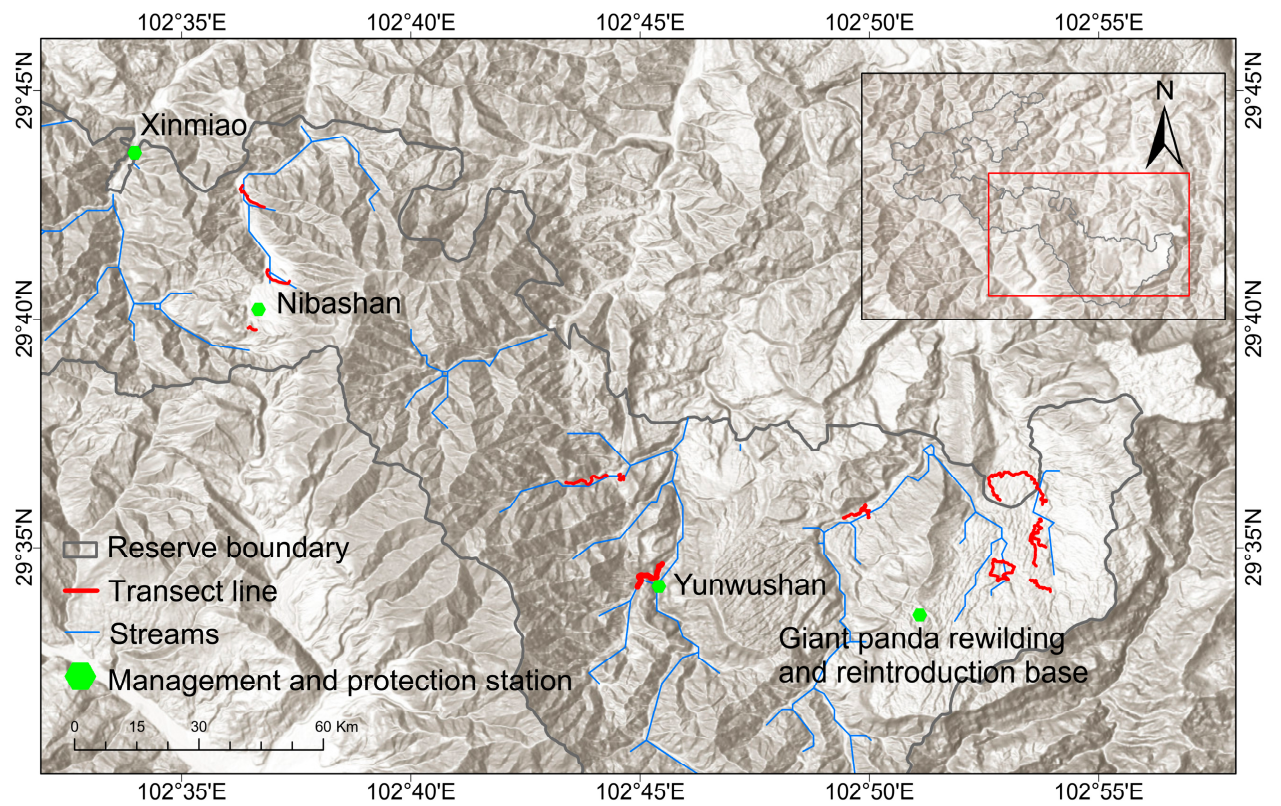

**Figure S1.** Map depicting the distribution of management and protection stations and transects in Yingjing area of Giant Panda National Park.

**Table S1.** The basic information for Maxent result.

| Replicate | Current |         |        | SSP-1.26 |         |        | SSP-2.45 |         |        | SSP-5.85 |         |        |
|-----------|---------|---------|--------|----------|---------|--------|----------|---------|--------|----------|---------|--------|
| model     | AUC     | TSS     | Kappa  | AUC      | TSS     | Kappa  | AUC      | TSS     | Kappa  | AUC      | TSS     | Kappa  |
| Model 1   | 0.7448  | -0.2505 | 0.0006 | 0.7452   | -0.1768 | 0.0006 | 0.7117   | -0.1981 | 0.0005 | 0.6965   | -0.1822 | 0.0005 |
| Model 2   | 0.9712  | 0.7276  | 0.0067 | 0.9712   | 0.7771  | 0.0067 | 0.9694   | 0.7602  | 0.0063 | 0.9602   | 0.786   | 0.0048 |
| Model 3   | 0.9479  | 0.7584  | 0.0036 | 0.9133   | 0.814   | 0.0021 | 0.9261   | 0.7833  | 0.0025 | 0.9091   | 0.8179  | 0.0020 |
| Model 4   | 0.5355  | -0.1325 | 0.0002 | 0.3508   | -0.113  | 0.0001 | 0.3281   | -0.1385 | 0.0001 | 0.3785   | -0.1311 | 0.0001 |
| Model 5   | 0.6918  | -0.0766 | 0.0004 | 0.7141   | -0.2503 | 0.0005 | 0.6753   | -0.0931 | 0.0004 | 0.6538   | -0.0909 | 0.0004 |
| Model 6   | 0.9845  | 0.7062  | 0.0125 | 0.9727   | 0.8064  | 0.0071 | 0.9783   | 0.747   | 0.0089 | 0.9721   | 0.7972  | 0.0069 |
| Model 7   | 0.9634  | 0.7096  | 0.0052 | 0.9829   | 0.7737  | 0.0114 | 0.9744   | 0.748   | 0.0076 | 0.9670   | 0.7657  | 0.0058 |

TSS: True Skill Statistic; Kappa: Cohen's Kappa; AUC: Area Under the Curve of Receiver Operator Characteristic Curves. The evaluation criteria for TSS are as follows: Excellent, 1—0.85; Very good, 0.7—0.85; Good, 0.55—0.7; Fair, 0.4—0.55; Poor, <0.4. The evaluation criteria for Kappa are: Excellent, 1—0.85; Very good, 0.7—0.85; Good, 0.55—0.7; Fair, 0.4—0.55; Poor, <0.4. The evaluation criteria for AUC are: Excellent, 0.9—1; Good, 0.8—0.9; Fair, 0.7—0.8; Poor, 0.6—0.7; Failed, 0.5—0.6.
